# Supplementary material for: A cost-effective RNA sequencing protocol for large-scale gene expression studies
Source: PubMed Central journal article supplement (PMC4381617; doi:10.1038/srep09570), 2015-04-01
Supplement: srep09570-s1.pdf [file srep09570-s1.pdf]

## Supplemental Information

**Title: A cost effective RNA sequencing protocol for large-scale gene expression studies**

Running title: **A cost effective RNA sequencing protocol**

### **Authors:**

**Zhonggang Hou (Co-corresponding author)**

Morgridge Institute for Research  
Madison, Wisconsin 53715, United States of America

**Peng Jiang**

Morgridge Institute for Research  
Madison, Wisconsin 53715, United States of America

**Scott A. Swanson**

Morgridge Institute for Research  
Madison, Wisconsin 53715, United States of America

**Angela L. Elwell**

Morgridge Institute for Research  
Madison, Wisconsin 53715, United States of America

**Bao Kim S. Nguyen**

Morgridge Institute for Research  
Madison, Wisconsin 53715, United States of America

**Jennifer M. Bolin**

Morgridge Institute for Research  
Madison, Wisconsin 53715, United States of America

**Ron Stewart**

Morgridge Institute for Research  
Madison, Wisconsin 53715, United States of America

**James A. Thomson (Co-corresponding author)**

Morgridge Institute for Research  
Madison, Wisconsin 53715, United States of America

Department of Cell and Regenerative Biology, University of Wisconsin-Madison,  
Madison, Wisconsin 53706, United States of America

Department of Molecular, Cellular, and Developmental Biology, University of California Santa Barbara  
Santa Barbara, California, United States of America

## Supplemental Methods

### Detailed LM-Seq library prep protocol

1. mRNA Isolation (NEB Next Poly A+ Isolation Kit, NEB #E7490S/L)-Follow protocol with the following exceptions:

- Use 15 $\mu$ l beads per sample. Wash twice with 100 $\mu$ l 2X binding buffer, then resuspend in 50 $\mu$ l 2X binding buffer. If processing multiple samples at the same time, wash beads in bulk using 15ml conical tubes. Dilute 100ng total RNA in water to make final volume 50 $\mu$ l. Then add 50 $\mu$ l of resuspended beads.
- After mRNA binding, perform 1 wash instead of the recommended 2 washes.
- For final elution, use Elute, Prime, and Fragment buffer below and proceed to 2a (do not do final elution step in NEB Next Protocol)

2. Run reverse transcription reactions (Clontech SmartScribe kit):

a. Elute, Prime, and Fragment buffer

|                                                       | One reaction |
|-------------------------------------------------------|--------------|
| H <sub>2</sub> O                                      | 5 $\mu$ l    |
| 5x 1 <sup>st</sup> strand buffer (SmartScribe buffer) | 2.5 $\mu$ l  |
| 3' AD with random hexamer (20 $\mu$ M)- HZG883        | 0.75 $\mu$ l |

Add 8.25  $\mu$ l to beads from each mRNA isolation, incubate at 85°C for 7 min, then cool on ice. Put on magnet and transfer 6.5  $\mu$ l supernatant to step 2b.

b. cDNA synthesis

|                                          | One reaction |
|------------------------------------------|--------------|
| H <sub>2</sub> O                         | 1 $\mu$ l    |
| DTT (100mM)                              | 0.25 $\mu$ l |
| dNTP mix (10mM each)                     | 1 $\mu$ l    |
| RNase Inhibitor                          | 0.25 $\mu$ l |
| SmartScribe Reverse Transcriptase (100U) | 1 $\mu$ l    |
| Eluted mRNA from 2a                      | 6.5 $\mu$ l  |
| total                                    | 10 $\mu$ l   |

Incubate reaction at 23°C for 10min then 42°C for 30min. Then cool down reaction to RT.

c. Removing RNA

|                              | One reaction |
|------------------------------|--------------|
| RNase H (2U/ $\mu$ l)        | 0.5 $\mu$ l  |
| RNase A (1 $\mu$ g/ $\mu$ l) | 0.5 $\mu$ l  |
| cDNA from 2b                 | 10 $\mu$ l   |
| Total                        | 11 $\mu$ l   |

Incubate reaction at 37°C for 15min then 95°C for 5min.

3. Purify cDNA with AMPure XP beads.

- Add 20 $\mu$ l AMPure XP beads to each reaction. Mix well. Incubate at RT for 15min.

- b. Discard supernatant. Wash beads twice with 200µl 80% EtOH. Let the beads air dry for 5 to 10min. Beads are dry when cracks appear in the pellet.
- c. Elute in 12µl EB buffer
- d. Put on magnet and transfer 10µl to step 4.

4. Adaptor Ligation and PCR

- a. Adaptor Ligation (NEB) (NOTE: PEG8000 is very viscous):

|                             | One reaction |
|-----------------------------|--------------|
| 10X RNA ligase buffer       | 3µl          |
| PEG8000 (50%)               | 9.5µl        |
| ATP (10mM)                  | 3µl          |
| 5' AD Oligo (20µM)- HZG885  | 1.5µl        |
| T4 RNA ligase I (10000U/ml) | 3µl          |
| Eluted cDNA from step 3     | 10µl         |
| Total                       | 30µl total   |

Incubate at 22°C for 12 to 16 hours.

- b. Stop Ligation by adding 20µl of 10 mM Tris-HCl pH 8.0, 15 mM EDTA to each reaction
- c. Double AMPure XP Beads Cleanup (NOTE: during final elution, beads do not pellet to magnet as well as they normally do):

- i. 1<sup>st</sup> AMPure XP Cleanup (1.8 beads:1 rxn ratio):

- i1. Add 90µl Ampure XP beads to each reaction. Mix well. Incubate at RT for 15min.
- i2. Discard supernatant. Wash beads twice with 200µl 80% EtOH. Let the beads air dry for 5 to 10min. Beads are dry when cracks appear in the pellet.
- i3. Elute in 22µl EB buffer.
- i4. Put on magnet and transfer 20µl to a fresh tube.

- ii. 2<sup>nd</sup> AMPure XP Cleanup (1.8 beads:1 rxn ratio):

- ii1. Add 36µl Ampure XP beads to each reaction. Mix well. Incubate at RT for 15min.
- ii2. Discard supernatant. Wash beads twice with 200µl 80% EtOH. Let the beads air dry for 5 to 10min. Beads are dry when cracks appear in the pellet.
- ii3. Elute in 22µl EB buffer.
- ii4. Put on magnet and transfer 20µl to step 4d.

- d. PCR (Epicentre's FailSafe 2x Master Mix):

|                                | One reaction |
|--------------------------------|--------------|
| H2O                            | 8.5µl        |
| 5' Adaptor Primer LC056 (20µM) | 0.5µl        |
| FailSafe PCR PreMix E          | 30µl         |
| FailSafe PCR Enzyme            | 0.6µl        |
| 3' Index Primer (20µM)*        | 0.5µl        |
| Eluted cDNA from step 4c       | 20µl         |
| Total                          | 60.1µl       |

\*: If multiplexing, use a primer with unique index sequence for each sample to be run in the same lane.

Run the following program:

95°C for 1 min  
95°C for 10 sec  
55°C for 10 sec  
68°C for 3 min  
68°C for 7 min

} 18 cycles

e. Purify with AMPure XP beads using 1 beads:1 rxn ratio

- i. Add 60ul AMPure beads to each reaction. Mix well. Incubate at RT for 15min.
- ii. Discard supernatant. Wash beads twice with 200ul 80% EtOH. Let the beads air dry for 5 to 10min. Beads are dry when cracks appear in the pellet.
- iii. Elute in 22ul EB buffer.
- iv. Put on magnet and transfer 20ul to a fresh tube.

5. Quantify DNA concentration with PicoGreen Assay (Life Technologies) or Qubit's dsDNA HS Assay.

6. Pool samples. Skip this step if indexing is not required.

7. Purify with AMPure XP beads using 1 beads:1 rxn ratio; Elute in 27ul EB if pooling 96 or 48 samples and transfer 25ul to a fresh tube. Elute in 14ul EB if pooling less than 48 samples and transfer 12ul to a fresh tube.

8. Quantify pooled DNA with Qubit's dsDNA HS Assay and run an Agilent High Sensitivity DNA chip on the BioAnalyzer to check on the quality and the average size of the final library.

## Supplemental Figures

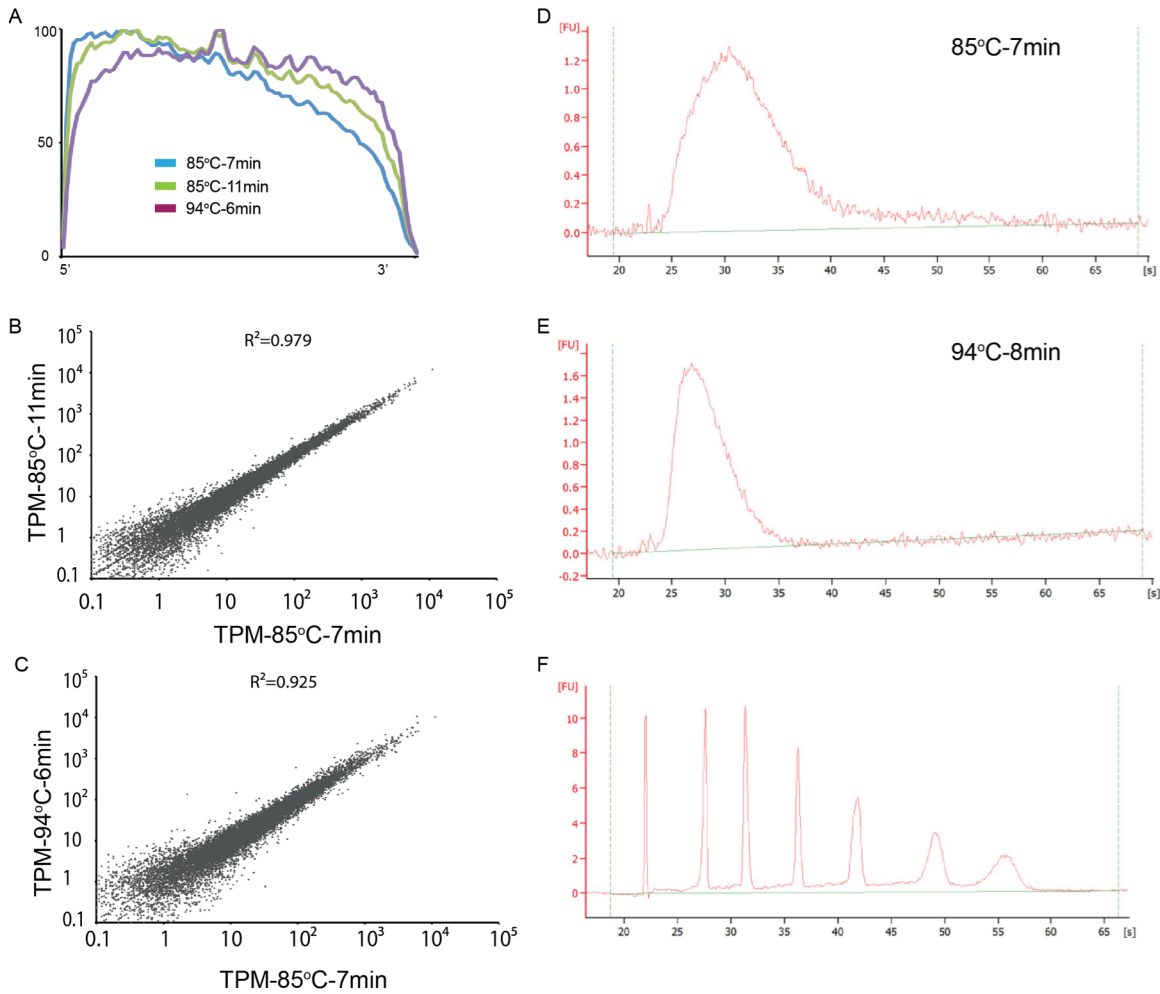

Supplemental Figure 1: Effect of RNA fragmentation on transcript read coverage. A. Average LM-Seq reads distribution across all transcripts under different RNA fragmentation conditions. Blue: 85°C for 7min. Green: 85°C for 11min. Purple: 94°C for 6min. B. and C. Scatter plot of TPM values of the same hES cells sample sequenced with LM-Seq using different RNA fragmentation conditions. Pearson correlation is reported on top of the plot. D. and E. Bioanalyzer electropherograms of fragmented mRNA using different fragmentation conditions. F. Bioanalyzer electropherogram of the RNA ladder.

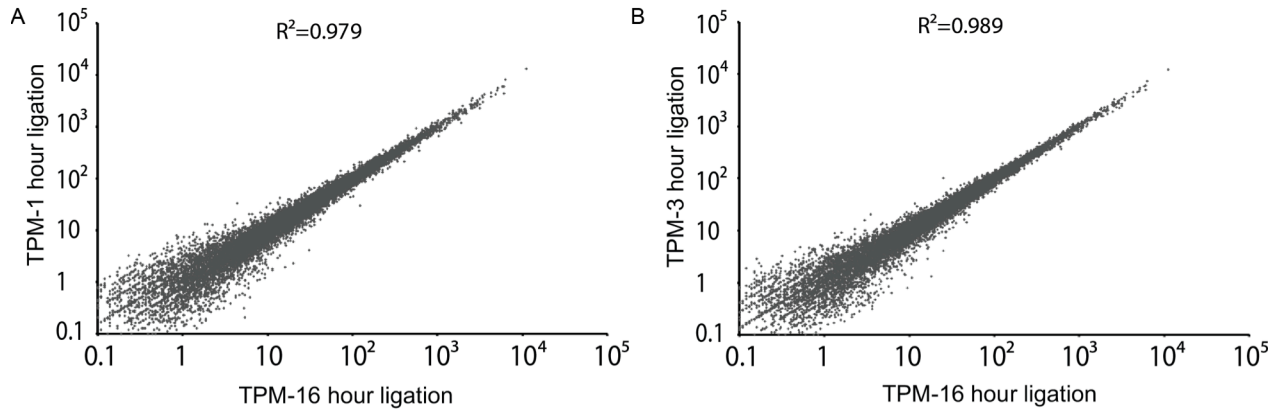

Supplemental Figure 2: Comparison of oligo ligation time. A. Scatter plot of TPM values of the same hES cells sample sequenced with LM-Seq using either 1hr or 16hr oligo ligation time. Pearson correlation is reported on top of the plot. B. Scatter plot of TPM values of the same hES cells sample sequenced with LM-Seq using either 3hr or 16hr oligo ligation time. Pearson correlation is reported on top of the plot.

Supplemental Table 1: Summary of reagent cost

| Item                                            | Vendor    | Cat number    | Price   | Number of reactions | Cost per sample |
|-------------------------------------------------|-----------|---------------|---------|---------------------|-----------------|
| NEBNext® Poly(A) mRNA Magnetic Isolation Module | NEB       | E7490L        | 193.60  | 96.00               | 2.02            |
| RiboGreen                                       | Life Tech | R11490        | 429.00  | 1000.00             | 0.04            |
| Qubit                                           | Life Tech | Q32852        | 70.00   | 100.00              | 0.70            |
| RNA 6000 Pico Kit                               | Agilent   | 5067-1513     | 672.00  | 275.00              | 0.22            |
| 3' AD HZG883                                    | IDT       | -             | 39.00   | 243.00              | 0.12            |
| 3' AD HZG885                                    | IDT       | -             | 39.00   | 243.00              | 0.24            |
| 5'AD LC056                                      | IDT       | -             | 39.00   | 243.00              | 0.08            |
| ZH AD LIG 96                                    | IDT       | -             | 39.00   | 243.00              | 0.08            |
| Ampure Beads                                    | Agencourt | A63882        | 5493.00 | 450.00              | 2.51            |
| RNase A                                         | Epicentre | MRNA092       | 56.00   | 2000.00             | 0.00            |
| RNase H                                         | NEB       | M0297L        | 256.00  | 625.00              | 0.41            |
| 10mM dNTP                                       | Life Tech | 18427088.00   | 399.00  | 1000.00             | 0.40            |
| Nuclease Free Water                             | Life Tech | AM9932        | 60.00   | 1000000.00          | 0.00            |
| RNase Inhibitor                                 | Life Tech | 10977-015     | 24.00   | 500.00              | 0.05            |
| Ethanol (80%)                                   | Sigma     | E7023-6X500ML | 279.00  | 100000.00           | 0.00            |
| EB Buffer                                       | Qiagen    | 19086.00      | 31.10   | 250.00              | 0.01            |
| T4 RNA Ligase 1                                 | NEB       | M0204L        | 201.60  | 500.00              | 1.21            |
| Smartscribe Rev Trans                           | Clontech  | 639538.00     | 550.00  | 400.00              | 1.38            |
| FailSafe PCR Enzyme                             | Epicentre | FS9901K       | 1013.00 | 400.00              | 1.52            |
| FailSafe PCR - Premix E                         | Epicentre | FSP995E-INCL  | 0.00    | 2500.00             | 0.00            |
| PicoGreen                                       | Life Tech | P7589         | 379.00  | 1000.00             | 0.04            |
| 1.5mL Tubes                                     | Life Tech | AM12450       | 42.75   | 500.00              | 0.09            |
| PCR Tubes                                       | Life Tech | AM12230       | 153.00  | 125.00              | 1.22            |
| p20 tips                                        | Rainin    | RT-L10F       | 45.93   | 9600.00             | 0.19            |
| p200 tips                                       | Rainin    | RT-L200F      | 91.85   | 9600.00             | 0.53            |
| p1000 tips                                      | Rainin    | RT-L1000F     | 91.85   | 7680.00             | 0.26            |
| Total per Sample                                |           |               |         |                     | 13.32           |

Supplemental Table 2: Index primer sequences\*

| Primer Name        | Reverse complement of the index embedded in the FNC of the adapter    |
|--------------------|-----------------------------------------------------------------------|
| ZH001              | CAAGCAGAAGACGGCATAACGAGATttgggttaggtGTGACTGGAGTTCCTTGGCACCCGAGAATTCCA |
| ZH002              | CAAGCAGAAGACGGCATAACGAGATttggaattaaGTGACTGGAGTTCCTTGGCACCCGAGAATTCCA  |
| ZH003              | CAAGCAGAAGACGGCATAACGAGATttgataggcaGTGACTGGAGTTCCTTGGCACCCGAGAATTCCA  |
| ZH004              | CAAGCAGAAGACGGCATAACGAGATttgaagactcGTGACTGGAGTTCCTTGGCACCCGAGAATTCCA  |
| ZH005              | CAAGCAGAAGACGGCATAACGAGATttctcttcgGTGACTGGAGTTCCTTGGCACCCGAGAATTCCA   |
| ZH006              | CAAGCAGAAGACGGCATAACGAGATttcgtcgctaGTGACTGGAGTTCCTTGGCACCCGAGAATTCCA  |
| ZH007              | CAAGCAGAAGACGGCATAACGAGATttcggctgagGTGACTGGAGTTCCTTGGCACCCGAGAATTCCA  |
| ZH008              | CAAGCAGAAGACGGCATAACGAGATttcataacggGTGACTGGAGTTCCTTGGCACCCGAGAATTCCA  |
| ZH009              | CAAGCAGAAGACGGCATAACGAGATttcaatcgtGTGACTGGAGTTCCTTGGCACCCGAGAATTCCA   |
| ZH010              | CAAGCAGAAGACGGCATAACGAGATttcaaggacGTGACTGGAGTTCCTTGGCACCCGAGAATTCCA   |
| ZH011              | CAAGCAGAAGACGGCATAACGAGATttagccgcccGTGACTGGAGTTCCTTGGCACCCGAGAATTCCA  |
| ZH012              | CAAGCAGAAGACGGCATAACGAGATtggaaagctagGTGACTGGAGTTCCTTGGCACCCGAGAATTCCA |
| ZH013              | CAAGCAGAAGACGGCATAACGAGATtgccgcgtaaGTGACTGGAGTTCCTTGGCACCCGAGAATTCCA  |
| ZH014              | CAAGCAGAAGACGGCATAACGAGATtgatgaagcGTGACTGGAGTTCCTTGGCACCCGAGAATTCCA   |
| ZH015              | CAAGCAGAAGACGGCATAACGAGATtgaatgcgccGTGACTGGAGTTCCTTGGCACCCGAGAATTCCA  |
| ZH016              | CAAGCAGAAGACGGCATAACGAGATtcttgacctcGTGACTGGAGTTCCTTGGCACCCGAGAATTCCA  |
| ZH017              | CAAGCAGAAGACGGCATAACGAGATtcttacgctaGTGACTGGAGTTCCTTGGCACCCGAGAATTCCA  |
| ZH018              | CAAGCAGAAGACGGCATAACGAGATtctgagaaggGTGACTGGAGTTCCTTGGCACCCGAGAATTCCA  |
| ZH019              | CAAGCAGAAGACGGCATAACGAGATtctccgccagGTGACTGGAGTTCCTTGGCACCCGAGAATTCCA  |
| ZH020              | CAAGCAGAAGACGGCATAACGAGATtctaggttgcGTGACTGGAGTTCCTTGGCACCCGAGAATTCCA  |
| ZH021              | CAAGCAGAAGACGGCATAACGAGATtctaattgcGTGACTGGAGTTCCTTGGCACCCGAGAATTCCA   |
| ZH022              | CAAGCAGAAGACGGCATAACGAGATtcattcctcgGTGACTGGAGTTCCTTGGCACCCGAGAATTCCA  |
| ZH023              | CAAGCAGAAGACGGCATAACGAGATtcaagcgaggGTGACTGGAGTTCCTTGGCACCCGAGAATTCCA  |
| ZH024              | CAAGCAGAAGACGGCATAACGAGATtaggcttatGTGACTGGAGTTCCTTGGCACCCGAGAATTCCA   |
| ZH025              | CAAGCAGAAGACGGCATAACGAGATtacgtaggacGTGACTGGAGTTCCTTGGCACCCGAGAATTCCA  |
| ZH026              | CAAGCAGAAGACGGCATAACGAGATtaacgagattGTGACTGGAGTTCCTTGGCACCCGAGAATTCCA  |
| ZH027              | CAAGCAGAAGACGGCATAACGAGATgttcggcatGTGACTGGAGTTCCTTGGCACCCGAGAATTCCA   |
| ZH028 <sup>x</sup> | CAAGCAGAAGACGGCATAACGAGATgttaggagccGTGACTGGAGTTCCTTGGCACCCGAGAATTCCA  |
| ZH029              | CAAGCAGAAGACGGCATAACGAGATgttaatggaaGTGACTGGAGTTCCTTGGCACCCGAGAATTCCA  |
| ZH030              | CAAGCAGAAGACGGCATAACGAGATgtcaactctGTGACTGGAGTTCCTTGGCACCCGAGAATTCCA   |
| ZH031              | CAAGCAGAAGACGGCATAACGAGATgtagttatgcGTGACTGGAGTTCCTTGGCACCCGAGAATTCCA  |
| ZH032              | CAAGCAGAAGACGGCATAACGAGATgttagtactGTGACTGGAGTTCCTTGGCACCCGAGAATTCCA   |
| ZH033              | CAAGCAGAAGACGGCATAACGAGATgtactggtaaGTGACTGGAGTTCCTTGGCACCCGAGAATTCCA  |
| ZH034              | CAAGCAGAAGACGGCATAACGAGATggttcactcGTGACTGGAGTTCCTTGGCACCCGAGAATTCCA   |
| ZH035              | CAAGCAGAAGACGGCATAACGAGATggttaagtatcGTGACTGGAGTTCCTTGGCACCCGAGAATTCCA |
| ZH036              | CAAGCAGAAGACGGCATAACGAGATggcggcaattGTGACTGGAGTTCCTTGGCACCCGAGAATTCCA  |



|       |                                                                       |
|-------|-----------------------------------------------------------------------|
| ZH037 | CAAGCAGAAGACGGCATAACGAGATggccaagt agGTGACTGGAGTTCCTTGGCACCCGAGAATTCCA |
| ZH038 | CAAGCAGAAGACGGCATAACGAGATggcattgatGTGACTGGAGTTCCTTGGCACCCGAGAATTCCA   |
| ZH039 | CAAGCAGAAGACGGCATAACGAGATggaataaccagGTGACTGGAGTTCCTTGGCACCCGAGAATTCCA |
| ZH040 | CAAGCAGAAGACGGCATAACGAGATggaactagcGTGACTGGAGTTCCTTGGCACCCGAGAATTCCA   |
| ZH041 | CAAGCAGAAGACGGCATAACGAGATgcttgccctaaGTGACTGGAGTTCCTTGGCACCCGAGAATTCCA |
| ZH042 | CAAGCAGAAGACGGCATAACGAGATgctgcaaggagGTGACTGGAGTTCCTTGGCACCCGAGAATTCCA |
| ZH043 | CAAGCAGAAGACGGCATAACGAGATgctcttcgtGTGACTGGAGTTCCTTGGCACCCGAGAATTCCA   |
| ZH044 | CAAGCAGAAGACGGCATAACGAGATgctatctgacGTGACTGGAGTTCCTTGGCACCCGAGAATTCCA  |
| ZH045 | CAAGCAGAAGACGGCATAACGAGATgctagagccGTGACTGGAGTTCCTTGGCACCCGAGAATTCCA   |
| ZH046 | CAAGCAGAAGACGGCATAACGAGATgcgtagagacGTGACTGGAGTTCCTTGGCACCCGAGAATTCCA  |
| ZH047 | CAAGCAGAAGACGGCATAACGAGATgcggtattcctGTGACTGGAGTTCCTTGGCACCCGAGAATTCCA |
| ZH048 | CAAGCAGAAGACGGCATAACGAGATgcgctgactGTGACTGGAGTTCCTTGGCACCCGAGAATTCCA   |
| ZH049 | CAAGCAGAAGACGGCATAACGAGATgctgaatggGTGACTGGAGTTCCTTGGCACCCGAGAATTCCA   |
| ZH050 | CAAGCAGAAGACGGCATAACGAGATgcagagttGTGACTGGAGTTCCTTGGCACCCGAGAATTCCA    |
| ZH051 | CAAGCAGAAGACGGCATAACGAGATgcaataagttGTGACTGGAGTTCCTTGGCACCCGAGAATTCCA  |
| ZH052 | CAAGCAGAAGACGGCATAACGAGATgcaacttaagGTGACTGGAGTTCCTTGGCACCCGAGAATTCCA  |
| ZH053 | CAAGCAGAAGACGGCATAACGAGATgcaacgcctcGTGACTGGAGTTCCTTGGCACCCGAGAATTCCA  |
| ZH054 | CAAGCAGAAGACGGCATAACGAGATgatggcggtcGTGACTGGAGTTCCTTGGCACCCGAGAATTCCA  |
| ZH055 | CAAGCAGAAGACGGCATAACGAGATgaggagccGTGACTGGAGTTCCTTGGCACCCGAGAATTCCA    |
| ZH056 | CAAGCAGAAGACGGCATAACGAGATgagccgCGGTGACTGGAGTTCCTTGGCACCCGAGAATTCCA    |
| ZH057 | CAAGCAGAAGACGGCATAACGAGATgagcatggtGTGACTGGAGTTCCTTGGCACCCGAGAATTCCA   |
| ZH058 | CAAGCAGAAGACGGCATAACGAGATgacttgattcGTGACTGGAGTTCCTTGGCACCCGAGAATTCCA  |
| ZH059 | CAAGCAGAAGACGGCATAACGAGATgactaaggcaGTGACTGGAGTTCCTTGGCACCCGAGAATTCCA  |
| ZH060 | CAAGCAGAAGACGGCATAACGAGATcttacgtcGTGACTGGAGTTCCTTGGCACCCGAGAATTCCA    |
| ZH061 | CAAGCAGAAGACGGCATAACGAGATctcttcaaccGTGACTGGAGTTCCTTGGCACCCGAGAATTCCA  |
| ZH062 | CAAGCAGAAGACGGCATAACGAGATctcgctggatGTGACTGGAGTTCCTTGGCACCCGAGAATTCCA  |
| ZH063 | CAAGCAGAAGACGGCATAACGAGATctcgcatcGTGACTGGAGTTCCTTGGCACCCGAGAATTCCA    |
| ZH064 | CAAGCAGAAGACGGCATAACGAGATctcaacctGTGACTGGAGTTCCTTGGCACCCGAGAATTCCA    |
| ZH065 | CAAGCAGAAGACGGCATAACGAGATctagacgcagGTGACTGGAGTTCCTTGGCACCCGAGAATTCCA  |
| ZH066 | CAAGCAGAAGACGGCATAACGAGATctaccagccaGTGACTGGAGTTCCTTGGCACCCGAGAATTCCA  |
| ZH067 | CAAGCAGAAGACGGCATAACGAGATcgtagcaagcGTGACTGGAGTTCCTTGGCACCCGAGAATTCCA  |
| ZH068 | CAAGCAGAAGACGGCATAACGAGATcgcattctGTGACTGGAGTTCCTTGGCACCCGAGAATTCCA    |
| ZH069 | CAAGCAGAAGACGGCATAACGAGATcgagaataGTGACTGGAGTTCCTTGGCACCCGAGAATTCCA    |
| ZH070 | CAAGCAGAAGACGGCATAACGAGATctgctattGTGACTGGAGTTCCTTGGCACCCGAGAATTCCA    |
| ZH071 | CAAGCAGAAGACGGCATAACGAGATccatataacGTGACTGGAGTTCCTTGGCACCCGAGAATTCCA   |
| ZH072 | CAAGCAGAAGACGGCATAACGAGATccaatgatacGTGACTGGAGTTCCTTGGCACCCGAGAATTCCA  |
| ZH073 | CAAGCAGAAGACGGCATAACGAGATattgatgctGTGACTGGAGTTCCTTGGCACCCGAGAATTCCA   |
| ZH074 | CAAGCAGAAGACGGCATAACGAGATatggtaattGTGACTGGAGTTCCTTGGCACCCGAGAATTCCA   |
| ZH075 | CAAGCAGAAGACGGCATAACGAGATatgacaccggGTGACTGGAGTTCCTTGGCACCCGAGAATTCCA  |

|       |                                                                      |
|-------|----------------------------------------------------------------------|
| ZH076 | CAAGCAGAAGACGGCATAACGAGATatgcctgataGTGACTGGAGTTCCTTGGCACCCGAGAATTCCA |
| ZH077 | CAAGCAGAAGACGGCATAACGAGATatccttgccgGTGACTGGAGTTCCTTGGCACCCGAGAATTCCA |
| ZH078 | CAAGCAGAAGACGGCATAACGAGATatatagcctgGTGACTGGAGTTCCTTGGCACCCGAGAATTCCA |
| ZH079 | CAAGCAGAAGACGGCATAACGAGATataggtatcGTGACTGGAGTTCCTTGGCACCCGAGAATTCCA  |
| ZH080 | CAAGCAGAAGACGGCATAACGAGATataattagcgGTGACTGGAGTTCCTTGGCACCCGAGAATTCCA |
| ZH081 | CAAGCAGAAGACGGCATAACGAGATagttgctgccGTGACTGGAGTTCCTTGGCACCCGAGAATTCCA |
| ZH082 | CAAGCAGAAGACGGCATAACGAGATagttccgtagGTGACTGGAGTTCCTTGGCACCCGAGAATTCCA |
| ZH083 | CAAGCAGAAGACGGCATAACGAGATaggaatgaccGTGACTGGAGTTCCTTGGCACCCGAGAATTCCA |
| ZH084 | CAAGCAGAAGACGGCATAACGAGATagcttctcttGTGACTGGAGTTCCTTGGCACCCGAGAATTCCA |
| ZH085 | CAAGCAGAAGACGGCATAACGAGATagactggccgGTGACTGGAGTTCCTTGGCACCCGAGAATTCCA |
| ZH086 | CAAGCAGAAGACGGCATAACGAGATagacgtagatGTGACTGGAGTTCCTTGGCACCCGAGAATTCCA |
| ZH087 | CAAGCAGAAGACGGCATAACGAGATacttatctgcGTGACTGGAGTTCCTTGGCACCCGAGAATTCCA |
| ZH088 | CAAGCAGAAGACGGCATAACGAGATactggtaacGTGACTGGAGTTCCTTGGCACCCGAGAATTCCA  |
| ZH089 | CAAGCAGAAGACGGCATAACGAGATactgcattacGTGACTGGAGTTCCTTGGCACCCGAGAATTCCA |
| ZH090 | CAAGCAGAAGACGGCATAACGAGATactctagatgGTGACTGGAGTTCCTTGGCACCCGAGAATTCCA |
| ZH091 | CAAGCAGAAGACGGCATAACGAGATacggatggagGTGACTGGAGTTCCTTGGCACCCGAGAATTCCA |
| ZH092 | CAAGCAGAAGACGGCATAACGAGATacgcgcaagtGTGACTGGAGTTCCTTGGCACCCGAGAATTCCA |
| ZH093 | CAAGCAGAAGACGGCATAACGAGATacgacgcgaaGTGACTGGAGTTCCTTGGCACCCGAGAATTCCA |
| ZH094 | CAAGCAGAAGACGGCATAACGAGATacctctccatGTGACTGGAGTTCCTTGGCACCCGAGAATTCCA |
| ZH095 | CAAGCAGAAGACGGCATAACGAGATaccagcagcaGTGACTGGAGTTCCTTGGCACCCGAGAATTCCA |
| ZH096 | CAAGCAGAAGACGGCATAACGAGAaattggetcgGTGACTGGAGTTCCTTGGCACCCGAGAATTCCA  |

\*: Oligonucleotide sequences © 2007-2013 Illumina, Inc. All rights reserved. Derivative works created by Illumina customers are authorized for use with Illumina instruments and products only. All other uses are strictly prohibited.

&: This index was not included in the test sample sets reported in the manuscript due to failed library amplification, likely due to accidental sample loss during purification. However, it has been used in other library preparations using LM-Seq with very good results.
